# Supplementary material for: Maternal Intake of Lutein and Zeaxanthin during Pregnancy Is Positively Associated with Offspring Verbal Intelligence and Behavior Regulation in Mid-Childhood in the Project Viva Cohort
Source: PubMed Central journal article supplement — J Nutr. 2021 Jan 20;151(3):615–27. doi: 10.1093/jn/nxaa348 (PMC7948203; doi:10.1093/jn/nxaa348), 2021-01-20
Supplement: nxaa348_supplemental_file.pdf [file nxaa348_supplemental_file.pdf]

**Maternal intake of lutein and zeaxanthin during pregnancy is positively associated with offspring verbal intelligence and behavior regulation in mid-childhood in the Project Viva cohort**

Hiya A Mahmassani – Online Supplementary Material

**Supplemental Table 1 – Associations of maternal intake of lutein and zeaxanthin (L/Z) during pregnancy with child cognitive and behavioral outcomes (subtest scores only)**

| Child outcome<br>Trimester<br>Model <sup>b</sup> | Quartiles of maternal L/Z intake <sup>a</sup> |                                            |                               |                               |
|--------------------------------------------------|-----------------------------------------------|--------------------------------------------|-------------------------------|-------------------------------|
|                                                  | Quartile 1 (Ref)                              | Quartile 2<br>$\beta$ (95%CI) <sup>c</sup> | Quartile 3<br>$\beta$ (95%CI) | Quartile 4<br>$\beta$ (95%CI) |
| <b>Early Childhood</b>                           |                                               |                                            |                               |                               |
| <b>WRAVMA Pegboard</b>                           |                                               |                                            |                               |                               |
| <b>T1 (n=1232)</b>                               |                                               |                                            |                               |                               |
| Model 0                                          | 0                                             | 0.54 (-1.23, 2.32)                         | -0.29 (-2.05, 1.46)           | -1.06 (-2.79, 0.67)           |
| Model 1                                          | 0                                             | 0.34 (-1.44, 2.13)                         | -0.78 (-2.57, 1.01)           | -1.48 (-3.27, 0.31)           |
| Model 2                                          | 0                                             | 0.20 (-1.59, 1.99)                         | -0.88 (-2.70, 0.94)           | -1.64 (-3.52, 0.24)           |
| <b>T2 (n=1201)</b>                               |                                               |                                            |                               |                               |
| Model 0                                          | 0                                             | -0.90 (-2.74, 0.95)                        | -0.87 (-2.70, 0.97)           | -1.32 (-3.13, 0.49)           |
| Model 1                                          | 0                                             | -1.06 (-2.93, 0.80)                        | -1.37 (-3.23, 0.50)           | -1.83 (-3.71, 0.05)           |
| Model 2                                          | 0                                             | -1.06 (-2.95, 0.83)                        | -1.29 (-3.22, 0.63)           | -1.66 (-3.69, 0.37)           |
| <b>WRAVMA Drawing</b>                            |                                               |                                            |                               |                               |
| <b>T1 (n=1235)</b>                               |                                               |                                            |                               |                               |
| Model 0                                          | 0                                             | 0.18 (-1.67, 2.03)                         | -0.48 (-2.30, 1.34)           | 0.28 (-1.51, 2.07)            |
| Model 1                                          | 0                                             | -0.07 (-1.93, 1.79)                        | -1.04 (-2.89, 0.82)           | -0.44 (-2.29, 1.41)           |
| Model 2                                          | 0                                             | -0.14 (-2.02, 1.74)                        | -1.19 (-3.08, 0.70)           | -0.72 (-2.68, 1.23)           |
| <b>T2 (n=1203)</b>                               |                                               |                                            |                               |                               |
| Model 0                                          | 0                                             | 0.67 (-1.15, 2.50)                         | 1.70 (-0.13, 3.53)            | <b>2.64 (0.83, 4.45)</b>      |
| Model 1                                          | 0                                             | 0.40 (-1.44, 2.25)                         | 1.14 (-0.73, 3.00)            | <b>1.99 (0.11, 3.87)</b>      |
| Model 2                                          | 0                                             | 0.42 (-1.45, 2.29)                         | 1.12 (-0.80, 3.03)            | 1.91 (-0.11, 3.93)            |
| <b>WRAVMA Matching</b>                           |                                               |                                            |                               |                               |
| <b>T1 (n=1189)</b>                               |                                               |                                            |                               |                               |
| Model 0                                          | 0                                             | 1.13 (-1.11, 3.37)                         | 1.10 (-1.13, 3.33)            | 1.18 (-1.04, 3.40)            |
| Model 1                                          | 0                                             | 0.33 (-1.84, 2.51)                         | -0.37 (-2.56, 1.83)           | -0.19 (-2.40, 2.02)           |
| Model 2                                          | 0                                             | 0.16 (-2.03, 2.36)                         | -0.51 (-2.75, 1.72)           | -0.41 (-2.74, 1.92)           |
| <b>T2 (n=1158)</b>                               |                                               |                                            |                               |                               |
| Model 0                                          | 0                                             | 0.55 (-1.75, 2.86)                         | 1.15 (-1.15, 3.44)            | 1.46 (-0.81, 3.72)            |
| Model 1                                          | 0                                             | -0.31 (-2.57, 1.94)                        | -0.44 (-2.73, 1.85)           | 0.12 (-2.18, 2.42)            |
| Model 2                                          | 0                                             | -0.19 (-2.48, 2.09)                        | -0.24 (-2.59, 2.11)           | 0.46 (-2.00, 2.91)            |
| <b>Mid-childhood</b>                             |                                               |                                            |                               |                               |
| <b>WRAML design memory</b>                       |                                               |                                            |                               |                               |
| <b>T1 (n=1098)</b>                               |                                               |                                            |                               |                               |
| Model 0                                          | 0                                             | <b>0.78 (0.29, 1.28)</b>                   | <b>0.81 (0.32, 1.30)</b>      | <b>0.59 (0.11, 1.07)</b>      |
| Model 1                                          | 0                                             | <b>0.73 (0.23, 1.23)</b>                   | <b>0.70 (0.20, 1.20)</b>      | 0.47 (-0.03, 0.97)            |
| Model 2                                          | 0                                             | <b>0.64 (0.13, 1.14)</b>                   | <b>0.62 (0.11, 1.13)</b>      | 0.30 (-0.23, 0.83)            |

|                             |   |                             |                             |                             |
|-----------------------------|---|-----------------------------|-----------------------------|-----------------------------|
| <b>T2 (n=1056)</b>          |   |                             |                             |                             |
| Model 0                     | 0 | 0.40 (-0.11, 0.91)          | 0.57 (0.06, 1.08)           | 0.40 (-0.10, 0.89)          |
| Model 1                     | 0 | 0.32 (-0.20, 0.83)          | 0.42 (-0.11, 0.95)          | 0.19 (-0.33, 0.72)          |
| Model 2                     | 0 | 0.32 (-0.20, 0.85)          | 0.43 (-0.11, 0.97)          | 0.20 (-0.36, 0.76)          |
| <b>WRAML picture memory</b> |   |                             |                             |                             |
| <b>T1 (n=1101)</b>          |   |                             |                             |                             |
| Model 0                     | 0 | 0.04 (-0.49, 0.58)          | -0.08 (-0.62, 0.46)         | 0.00 (-0.52, 0.53)          |
| Model 1                     | 0 | 0.01 (-0.54, 0.55)          | -0.15 (-0.71, 0.41)         | -0.07 (-0.62, 0.48)         |
| Model 2                     | 0 | -0.04 (-0.59, 0.52)         | -0.20 (-0.77, 0.37)         | -0.17 (-0.75, 0.42)         |
| <b>T2 (n=1059)</b>          |   |                             |                             |                             |
| Model 0                     | 0 | -0.02 (-0.57, 0.54)         | 0.15 (-0.40, 0.71)          | -0.29 (-0.83, 0.25)         |
| Model 1                     | 0 | -0.16 (-0.73, 0.40)         | 0.02 (-0.55, 0.60)          | -0.45 (-1.03, 0.13)         |
| Model 2                     | 0 | -0.12 (-0.70, 0.45)         | 0.06 (-0.53, 0.66)          | -0.43 (-1.05, 0.18)         |
| <b>BRIEF BRI</b>            |   |                             |                             |                             |
| <b>T1 (n=1181)</b>          |   |                             |                             |                             |
| Model 0                     | 0 | <b>-1.51 (-3.00, -0.01)</b> | <b>-2.27 (-3.76, -0.78)</b> | <b>-2.07 (-3.55, -0.59)</b> |
| Model 1                     | 0 | -1.21 (-2.72, 0.29)         | <b>-1.75 (-3.27, -0.23)</b> | <b>-1.67 (-3.20, -0.14)</b> |
| Model 2                     | 0 | -1.19 (-2.70, 0.31)         | <b>-1.66 (-3.19, -0.14)</b> | <b>-1.63 (-3.22, -0.04)</b> |
| <b>T2 (n=1139)</b>          |   |                             |                             |                             |
| Model 0                     | 0 | -0.94 (-2.51, 0.63)         | -1.53 (-3.09, 0.02)         | <b>-2.51 (-4.03, -0.99)</b> |
| Model 1                     | 0 | -0.65 (-2.23, 0.94)         | -1.07 (-2.68, 0.53)         | <b>-2.20 (-3.79, -0.60)</b> |
| Model 2                     | 0 | -0.45 (-2.04, 1.15)         | -0.80 (-2.44, 0.84)         | <b>-1.89 (-3.58, -0.21)</b> |
| <b>BRIEF MI</b>             |   |                             |                             |                             |
| <b>T1 (n=1174)</b>          |   |                             |                             |                             |
| Model 0                     | 0 | -0.18 (-1.67, 1.30)         | <b>-1.64 (-3.13, -0.15)</b> | -1.36 (-2.83, 0.10)         |
| Model 1                     | 0 | -0.08 (-1.57, 1.42)         | -1.36 (-2.87, 0.16)         | -1.21 (-2.73, 0.30)         |
| Model 2                     | 0 | -0.09 (-1.59, 1.41)         | -1.27 (-2.81, 0.26)         | -1.23 (-2.81, 0.35)         |
| <b>T2 (n=1132)</b>          |   |                             |                             |                             |
| Model 0                     | 0 | -0.34 (-1.92, 1.25)         | -0.74 (-2.30, 0.82)         | -1.25 (-2.77, 0.27)         |
| Model 1                     | 0 | -0.14 (-1.75, 1.47)         | -0.40 (-2.01, 1.20)         | -1.33 (-2.93, 0.26)         |
| Model 2                     | 0 | 0.06 (-1.54, 1.65)          | -0.04 (-1.67, 1.59)         | -0.91 (-2.57, 0.76)         |
| <b>SDQ Prosocial</b>        |   |                             |                             |                             |
| <b>T1 (n=1191)</b>          |   |                             |                             |                             |
| Model 0                     | 0 | 0.08 (-0.21, 0.36)          | 0.15 (-0.13, 0.43)          | <b>0.31 (0.04, 0.59)</b>    |
| Model 1                     | 0 | 0.09 (-0.20, 0.38)          | 0.17 (-0.11, 0.46)          | <b>0.37 (0.09, 0.66)</b>    |
| Model 2                     | 0 | 0.06 (-0.23, 0.35)          | 0.14 (-0.15, 0.43)          | 0.29 (-0.01, 0.59)          |
| <b>T2 (n=1148)</b>          |   |                             |                             |                             |
| Model 0                     | 0 | <b>0.33 (0.04, 0.63)</b>    | 0.09 (-0.20, 0.38)          | 0.20 (-0.08, 0.49)          |
| Model 1                     | 0 | <b>0.37 (0.07, 0.67)</b>    | 0.12 (-0.18, 0.42)          | <b>0.31 (0.01, 0.61)</b>    |
| Model 2                     | 0 | <b>0.35 (0.05, 0.65)</b>    | 0.09 (-0.22, 0.40)          | 0.25 (-0.06, 0.57)          |

---

<sup>a</sup>Median maternal L/Z intake (range), in mg/day, for each quartile

T1: Q1=0.97 (0.09 - 1.433); Q2=1.78 (1.434 - 2.200); Q3=2.64 (2.201 - 3.251); Q4= 4.51 (3.253 - 16.307)

T2: Q1=0.98 (0.05 - 1.426); Q2=1.82 (1.427 - 2.209); Q3=2.59 (2.210 - 3.187); Q4=4.48 (3.194 - 15.205)

Nutrient values were adjusted for total energy intake using the residual model.

<sup>b</sup>Model 0 (crude): Adjusted for child age and sex

Model 1 (multivariable): Model 0 adjusted for maternal socio-demographic characteristics (age, race/ethnicity, marital status, parity, education, income, smoking history, pre-pregnancy BMI).

Model 2 (multivariable): Model 1 additionally adjusted for trimester-specific intake of total energy, DHA, folate, choline, vitamin B12, alcohol.

<sup>c</sup> $\beta$  (95%CI) represent the difference in mean cognitive scores compared to the lowest quartile of maternal L/Z intake (Referent).

BRIEF BRI, Behavioral Rating Inventory of Executive Function Behavioral Regulation Index;

BRIEF MI, Behavioral Rating Inventory of Executive Function Metacognition Index; SDQ, Strengths and Difficulties Questionnaire; T1, first trimester of pregnancy; T2, second trimester of pregnancy; WRAML, Wide Range Assessment of Memory and Learning, Second Edition; WRAVMA, Wide Range Assessment of Visual Motor Abilities.

---

**Supplemental Table 2 – Associations of maternal intake of lutein and zeaxanthin-rich (L/Z-rich) foods<sup>a</sup> during pregnancy with child cognitive and behavioral outcomes (subtest scores only)**

| Child outcome<br>Trimester<br>Model <sup>c</sup> | Quartiles of maternal L/Z-rich foods intake <sup>b</sup> |                              |                      |                          |
|--------------------------------------------------|----------------------------------------------------------|------------------------------|----------------------|--------------------------|
|                                                  | Quartile 1 (Ref)                                         | Quartile 2                   | Quartile 3           | Quartile 4               |
|                                                  |                                                          | $\beta$ (95%CI) <sup>d</sup> | $\beta$ (95%CI)      | $\beta$ (95%CI)          |
| <b>Early Childhood</b>                           |                                                          |                              |                      |                          |
| <b>WRAVMA Pegboard</b>                           |                                                          |                              |                      |                          |
| <b>T1 (n=1232)</b>                               |                                                          |                              |                      |                          |
| Model 0                                          | 0                                                        | -0.66 (-2.41, 1.09)          | -0.76 (-2.52, 1.00)  | -1.09 (-2.83, 0.65)      |
| Model 1                                          | 0                                                        | -0.93 (-2.67, 0.81)          | -0.99 (-2.74, 0.77)  | -1.22 (-2.95, 0.52)      |
| Model 2                                          | 0                                                        | -0.77 (-2.54, 0.99)          | -0.69 (-2.55, 1.17)  | -0.65 (-2.68, 1.37)      |
| <b>T2 (n=1201)</b>                               |                                                          |                              |                      |                          |
| Model 0                                          | 0                                                        | -0.33 (-2.11, 1.45)          | -0.12 (-1.90, 1.67)  | -0.84 (-2.63, 0.94)      |
| Model 1                                          | 0                                                        | -0.31 (-2.10, 1.49)          | -0.41 (-2.20, 1.39)  | -0.97 (-2.76, 0.83)      |
| Model 2                                          | 0                                                        | 0.14 (-1.69, 1.97)           | 0.35 (-1.55, 2.25)   | 0.45 (-1.66, 2.56)       |
| <b>WRAVMA Drawing</b>                            |                                                          |                              |                      |                          |
| <b>T1 (n=1235)</b>                               |                                                          |                              |                      |                          |
| Model 0                                          | 0                                                        | -0.77 (-2.58, 1.05)          | -1.40 (-3.21, 0.40)  | -0.35 (-2.14, 1.45)      |
| Model 1                                          | 0                                                        | -1.10 (-2.90, 0.71)          | -1.60 (-3.41, 0.21)  | -0.54 (-2.34, 1.25)      |
| Model 2                                          | 0                                                        | -1.08 (-2.93, 0.77)          | -1.57 (-3.50, 0.36)  | -0.43 (-2.54, 1.69)      |
| <b>T2 (n=1203)</b>                               |                                                          |                              |                      |                          |
| Model 0                                          | 0                                                        | -0.37 (-2.21, 1.47)          | 0.74 (-1.09, 2.57)   | 0.73 (-1.11, 2.56)       |
| Model 1                                          | 0                                                        | -0.57 (-2.41, 1.28)          | 0.29 (-1.55, 2.12)   | 0.47 (-1.37, 2.31)       |
| Model 2                                          | 0                                                        | -0.42 (-2.30, 1.47)          | 0.47 (-1.47, 2.41)   | 0.95 (-1.22, 3.12)       |
| <b>WRAVMA Matching</b>                           |                                                          |                              |                      |                          |
| <b>T1 (n=1189)</b>                               |                                                          |                              |                      |                          |
| Model 0                                          | 0                                                        | 0.69 (-1.54, 2.91)           | -1.64 (-3.85, 0.57)  | 0.26 (-1.94, 2.45)       |
| Model 1                                          | 0                                                        | 0.00 (-2.13, 2.13)           | -2.31 (-4.44, -0.18) | -0.30 (-2.41, 1.82)      |
| Model 2                                          | 0                                                        | 0.22 (-1.95, 2.40)           | -1.99 (-4.28, 0.29)  | 0.51 (-1.98, 2.99)       |
| <b>T2 (n=1158)</b>                               |                                                          |                              |                      |                          |
| Model 0                                          | 0                                                        | -0.73 (-3.05, 1.59)          | 0.54 (-1.74, 2.82)   | -0.68 (-2.95, 1.59)      |
| Model 1                                          | 0                                                        | -1.01 (-3.26, 1.24)          | -0.21 (-2.45, 2.02)  | -1.26 (-3.49, 0.97)      |
| Model 2                                          | 0                                                        | -0.61 (-2.90, 1.69)          | 0.51 (-1.84, 2.86)   | -0.03 (-2.64, 2.57)      |
| <b>Mid-childhood</b>                             |                                                          |                              |                      |                          |
| <b>WRAML design memory</b>                       |                                                          |                              |                      |                          |
| <b>T1 (n=1098)</b>                               |                                                          |                              |                      |                          |
| Model 0                                          | 0                                                        | 0.17 (-0.33, 0.66)           | 0.22 (-0.27, 0.70)   | <b>0.53 (0.05, 1.00)</b> |
| Model 1                                          | 0                                                        | 0.17 (-0.33, 0.66)           | 0.17 (-0.32, 0.65)   | 0.48 (0.00, 0.95)        |
| Model 2                                          | 0                                                        | 0.12 (-0.38, 0.63)           | 0.10 (-0.42, 0.62)   | 0.42 (-0.14, 0.98)       |
| <b>T2 (n=1056)</b>                               |                                                          |                              |                      |                          |
| Model 0                                          | 0                                                        | 0.10 (-0.40, 0.60)           | -0.12 (-0.63, 0.38)  | 0.44 (-0.06, 0.93)       |
| Model 1                                          | 0                                                        | 0.06 (-0.44, 0.56)           | -0.23 (-0.73, 0.28)  | 0.34 (-0.16, 0.85)       |
| Model 2                                          | 0                                                        | 0.09 (-0.42, 0.61)           | -0.18 (-0.72, 0.36)  | 0.45 (-0.15, 1.06)       |

| <b>WRAML picture memory</b> |   |                          |                     |                             |
|-----------------------------|---|--------------------------|---------------------|-----------------------------|
| <b>T1 (n=1101)</b>          |   |                          |                     |                             |
| Model 0                     | 0 | -0.35 (-0.89, 0.18)      | -0.11 (-0.64, 0.41) | -0.17 (-0.70, 0.35)         |
| Model 1                     | 0 | -0.32 (-0.86, 0.22)      | -0.13 (-0.65, 0.40) | -0.20 (-0.73, 0.33)         |
| Model 2                     | 0 | -0.40 (-0.95, 0.16)      | -0.27 (-0.83, 0.30) | -0.42 (-1.04, 0.20)         |
| <b>T2 (n=1059)</b>          |   |                          |                     |                             |
| Model 0                     | 0 | -0.27 (-0.83, 0.30)      | -0.39 (-0.94, 0.15) | -0.24 (-0.79, 0.31)         |
| Model 1                     | 0 | -0.30 (-0.87, 0.26)      | -0.47 (-1.01, 0.08) | -0.30 (-0.86, 0.25)         |
| Model 2                     | 0 | -0.27 (-0.84, 0.31)      | -0.48 (-1.07, 0.10) | -0.33 (-0.99, 0.34)         |
| <b>BRIEF BRI</b>            |   |                          |                     |                             |
| <b>T1 (n=1181)</b>          |   |                          |                     |                             |
| Model 0                     | 0 | -0.36 (-1.84, 1.13)      | -0.39 (-1.89, 1.11) | -0.89 (-2.35, 0.57)         |
| Model 1                     | 0 | -0.07 (-1.54, 1.41)      | -0.05 (-1.53, 1.44) | -0.58 (-2.03, 0.87)         |
| Model 2                     | 0 | -0.42 (-1.91, 1.07)      | -0.54 (-2.10, 1.01) | <b>-1.76 (-3.45, -0.08)</b> |
| <b>T2 (n=1139)</b>          |   |                          |                     |                             |
| Model 0                     | 0 | 1.23 (-0.33, 2.79)       | -0.24 (-1.76, 1.29) | 0.03 (-1.52, 1.58)          |
| Model 1                     | 0 | 1.54 (-0.02, 3.09)       | 0.08 (-1.45, 1.60)  | 0.43 (-1.12, 1.97)          |
| Model 2                     | 0 | 1.35 (-0.22, 2.91)       | -0.51 (-2.12, 1.10) | -0.55 (-2.35, 1.24)         |
| <b>BRIEF MI</b>             |   |                          |                     |                             |
| <b>T1 (n=1174)</b>          |   |                          |                     |                             |
| Model 0                     | 0 | 0.15 (-1.33, 1.62)       | 0.39 (-1.11, 1.90)  | 0.28 (-1.17, 1.73)          |
| Model 1                     | 0 | 0.34 (-1.13, 1.81)       | 0.54 (-0.95, 2.03)  | 0.47 (-0.98, 1.92)          |
| Model 2                     | 0 | -0.15 (-1.64, 1.34)      | -0.13 (-1.70, 1.44) | -0.98 (-2.66, 0.69)         |
| <b>T2 (n=1132)</b>          |   |                          |                     |                             |
| Model 0                     | 0 | 1.19 (-0.39, 2.77)       | -0.10 (-1.65, 1.45) | 0.61 (-0.96, 2.19)          |
| Model 1                     | 0 | 1.46 (-0.11, 3.03)       | 0.09 (-1.44, 1.63)  | 0.82 (-0.74, 2.39)          |
| Model 2                     | 0 | 1.37 (-0.20, 2.94)       | -0.38 (-1.99, 1.23) | 0.16 (-1.65, 1.97)          |
| <b>SDQ Prosocial</b>        |   |                          |                     |                             |
| <b>T1 (n=1191)</b>          |   |                          |                     |                             |
| Model 0                     | 0 | <b>0.29 (0.01, 0.56)</b> | 0.21 (-0.07, 0.48)  | <b>0.46 (0.19, 0.73)</b>    |
| Model 1                     | 0 | 0.26 (-0.02, 0.54)       | 0.19 (-0.08, 0.47)  | <b>0.46 (0.19, 0.73)</b>    |
| Model 2                     | 0 | 0.23 (-0.05, 0.51)       | 0.12 (-0.18, 0.41)  | <b>0.37 (0.05, 0.69)</b>    |
| <b>T2 (n=1148)</b>          |   |                          |                     |                             |
| Model 0                     | 0 | 0.02 (-0.28, 0.31)       | 0.13 (-0.15, 0.42)  | 0.18 (-0.11, 0.47)          |
| Model 1                     | 0 | 0.00 (-0.30, 0.29)       | 0.12 (-0.17, 0.41)  | 0.20 (-0.09, 0.49)          |
| Model 2                     | 0 | -0.03 (-0.33, 0.27)      | 0.08 (-0.23, 0.39)  | 0.11 (-0.23, 0.44)          |

---

<sup>a</sup>L/Z-rich foods: top 10 contributors to total maternal L/Z intake in eligible sample (cooked spinach, raw spinach, romaine or leaf lettuce, kale, broccoli, peas or lima beans, orange juice with Ca, corn, eggplant or zucchini, mixed vegetables) and any food with L/Z  $\geq 1$  mg per 100g (Brussels sprouts, dark squash, popcorn, eggs).

<sup>b</sup>Median maternal L/Z-rich foods intake (range), in servings/day, for each quartile

T1: Q1=0.77 (0.07 $\leq$  –  $\leq$ 1.06), Q2=1.35 (1.06 $<$  –  $\leq$ 1.63), Q3=1.93 (1.63 $<$  –  $<$ 2.35), Q4=3.06 (2.35 $\leq$  –  $\leq$ 9.58)

T2: Q1=0.84 (0.00 $\leq$  –  $\leq$ 1.13), Q2=1.42 (1.13 $<$  –  $\leq$ 1.70), Q3=1.99 (1.70 $<$  –  $\leq$ 2.42), Q4=3.21 (2.42 $<$  –  $\leq$ 10.44)

<sup>c</sup>Model 0 (crude): Adjusted for child age and sex

Model 1 (multivariable): Model 0 adjusted for maternal socio-demographic characteristics (age, race/ethnicity, marital status, parity, education, income, smoking history, pre-pregnancy BMI).

Model 2 (multivariable): Model 1 additionally adjusted for trimester-specific intake of total energy, DHA, folate, choline, vitamin B12, alcohol.

<sup>d</sup> $\beta$  (95%CI) represent the difference in mean cognitive scores compared to the lowest quartile of maternal L/Z-rich foods intake (Referent).

BRIEF BRI, Behavioral Rating Inventory of Executive Function Behavioral Regulation Index;  
BRIEF MI, Behavioral Rating Inventory of Executive Function Metacognition Index; SDQ, Strengths and Difficulties Questionnaire; T1, first trimester of pregnancy; T2, second trimester of pregnancy; WRAML, Wide Range Assessment of Memory and Learning, Second Edition; WRAVMA, Wide Range Assessment of Visual Motor Abilities.

---
